# Supplementary material for: Telemedicine Service Use: A New Metric
Source: PubMed Central journal article supplement (PMC3799556; doi:10.2196/jmir.1938), 2012-12-19
Supplement: jmir_v14i6e178_app1.pdf [file jmir_v14i6e178_app1.pdf]

### Multimedia Appendix 1 Summary of data and sources

| Total Consults | Sites  | Duration Wks | Cons/Site/Week | Specialty             | Country       | Technology | Ref |
|----------------|--------|--------------|----------------|-----------------------|---------------|------------|-----|
| 14             | 3      | 312          | 0.01           | Dermatology           | USA           | SF         | 1   |
| 6              | 2      | 104          | 0.03           | Emergency             | USA           | VC         | 2   |
| 200            | 135    | 52           | 0.03           | Psychiatry            | Finland       | VC         | 3   |
| 3,560          | 271    | 520          | 0.03           | Mixed                 | China         | Mixed      | 4   |
| 88,103         | 48,707 | 52           | 0.03           | Cardiac - Teletriage  | Israel        | Tel        | 5   |
| 12,576         | 896    | 364          | 0.04           | Cardiology            | Italy         | Tel        | 6   |
| 36             | 19     | 52           | 0.04           | Child abuse           | USA           | email      | 7   |
| 10             | 2      | 104          | 0.05           | Neonatology           | USA           | VC         | 2   |
| 1,000          | 65     | 320          | 0.05           | Paediatric burns      | Australia     | VC         | 8   |
| 206            | 67     | 52           | 0.06           | Mixed                 | Global        | email      | 9   |
| 44             | 10     | 74           | 0.06           | Paediatric Crit Care  | USA           | VC         | 10  |
| 100            | 8      | 156          | 0.08           | Parkinson's           | USA           | VC         | 11  |
| 75             | 16     | 52           | 0.09           | Surgery               | USA           | VC         | 12  |
| 819            | 75     | 104          | 0.11           | Mixed                 | Australia     | VC         | 13  |
| 132            | 3      | 416          | 0.11           | Echo cardiology       | Ireland       | VC         | 14  |
| 1,672          | 212    | 52           | 0.15           | Mixed                 | Canada        | VC         | 15  |
| 505            | 29     | 108          | 0.16           | Dermatology           | Netherlands   | e-Mail     | 16  |
| 767            | 30     | 134          | 0.19           | Paediatric            | International | VC         | 17  |
| 46             | 2      | 100          | 0.23           | Cytology              | India         | e-Mail     | 18  |
| 165            | 12     | 52           | 0.26           | Neurology Stroke      | USA           | VC         | 19  |
| 88             | 2      | 147          | 0.30           | ER - stroke           | Canada        | VC         | 20  |
| 3,000          | 30     | 312          | 0.32           | Mixed                 | USA           | VC         | 21  |
| 66             | 1      | 195          | 0.34           | Surgery               | India         | VC         | 22  |
| 1,500          | 80     | 52           | 0.36           | Mixed                 | USA           | VC         | 23  |
| 40             | 1      | 104          | 0.38           | Cardiology            | Serbia/ UK    | VC         | 24  |
| 200            | 10     | 52           | 0.38           | Paediatrics - Abuse   | USA           | VC         | 25  |
| 43             | 1      | 104          | 0.41           | Paediatric ICU        | USA           | VC         | 26  |
| 1,458          | 14     | 247          | 0.42           | Audiology             | USA           | SF         | 27  |
| 23             | 1      | 52           | 0.44           | Trauma U/S            | Canada        | VC         | 28  |
| 1,684          | 68     | 52           | 0.48           | Telemental Health     | Canada        | VC         | 29  |
| 500            | 20     | 52           | 0.48           | Ante / neo natal care | USA           | VC         | 30  |
| 3,000          | 120    | 52           | 0.48           | Pathology             | Japan         | web        | 31  |
| 4,000          | 17     | 468          | 0.50           | School / Psychiatry   | USA           | VC         | 32  |
| 132            | 5      | 52           | 0.51           | Ophthalmology         | International | web        | 33  |
| 606            | 9      | 130          | 0.52           | Ped Mental Health     | Australia     | VC         | 34  |
| 217            | 3      | 130          | 0.56           | Pathology             | USA           | SF         | 35  |
| 203            | 4      | 78           | 0.65           | Psychiatry            | Denmark       | VC         | 36  |
| 311            | 3      | 156          | 0.66           | Neurology             | USA           | VC         | 2   |
| 88             | 1      | 126          | 0.70           | Paed Neuro-oncology   | International | SF         | 37  |

| <b>Total Consults</b> | <b>Sites</b> | <b>Duration Wks</b> | <b>Cons/Site/Week</b> | <b>Specialty</b>     | <b>Country</b> | <b>Technology</b> | <b>Ref</b> |
|-----------------------|--------------|---------------------|-----------------------|----------------------|----------------|-------------------|------------|
| 18,250                | 84           | 312                 | 0.70                  | Obstetrics           | USA            | Mixed             | 38         |
| 2,260                 | 6            | 520                 | 0.72                  | Psychiatry           | USA            | VC                | 39         |
| 3,800                 | 100          | 52                  | 0.73                  | Mixed                | USA            | VC                | 40         |
| 2,135                 | 51           | 52                  | 0.81                  | Prisons              | USA            | VC                | 41         |
| 30,000                | 700          | 52                  | 0.82                  | Mixed                | Canada         | VC                | 42         |
| 900                   | 19           | 52                  | 0.91                  | Mixed                | USA            | VC                | 40         |
| 638                   | 19           | 35                  | 0.96                  | Mixed                | USA            | email             | 43         |
| 508                   | 10           | 52                  | 0.98                  | Mental Health        | USA            | VC & Tel          | 44         |
| 835                   | 15           | 52                  | 1.07                  | Trauma               | Scotland       | VC                | 45         |
| 2,000                 | 16           | 104                 | 1.20                  | Echocardiology       | USA            | VC                | 46         |
| 97                    | 1            | 69                  | 1.41                  | Primary care         | Scotland       | VC                | 47         |
| 7,500                 | 20           | 260                 | 1.44                  | Psychiatry           | USA            | VC                | 48         |
| 75                    | 1            | 52                  | 1.44                  | Stroke               | Spain          | VC                | 49         |
| 2,500                 | 29           | 52                  | 1.66                  | Mixed                | USA            | VC                | 50         |
| 214                   | 1            | 119                 | 1.80                  | Mixed                | Cambodia       | e-Mail            | 51         |
| 387                   | 4            | 52                  | 1.86                  | Psychiatry           | USA            | VC                | 52         |
| 343                   | 1            | 156                 | 2.20                  | Neuropathology       | Austria        | web               | 53         |
| 229                   | 1            | 104                 | 2.20                  | Mixed                | USA            | VC                | 54         |
| 2,009                 | 12           | 74                  | 2.26                  | Dermatology          | Spain          | SF                | 55         |
| 118                   | 1            | 52                  | 2.27                  | Ophthalmology        | Australia      | web               | 56         |
| 958                   | 8            | 52                  | 2.30                  | Mixed paediatric     | USA            | VC                | 57         |
| 385                   | 1            | 156                 | 2.47                  | Echocardiology       | USA            | Mixed             | 58         |
| 747                   | 3            | 100                 | 2.49                  | Dialysis / education | USA            | VC                | 59         |
| 5,830                 | 9            | 260                 | 2.49                  | Cardiotocography     | Italy          | SF                | 60         |
| 26,777                | 31           | 342                 | 2.53                  | Dermatology          | USA            | SF                | 61         |
| 297                   | 1            | 104                 | 2.86                  | Genetics             | USA            | VC                | 62         |
| 511                   | 3            | 56                  | 3.04                  | Psychiatry           | USA            | VC                | 63         |
| 700                   | 4            | 52                  | 3.37                  | Neurology Stroke     | Germany        | VC                | 64         |
| 108,159               | 224          | 139                 | 3.47                  | ECG                  | Brazil         | Mixed             | 65         |
| 1,804                 | 2            | 260                 | 3.47                  | Neurology            | Ireland        | VC                | 66         |
| 1,105                 | 3            | 104                 | 3.54                  | Psychiatry / other   | USA            | VC                | 67         |
| 60,000                | 275          | 52                  | 4.20                  | Mixed                | USA            | VC                | 68         |
| 200,000               | 390          | 104                 | 4.93                  | ECG                  | Chile          | Mixed             | 69         |
| 451                   | 1            | 79                  | 5.71                  | Dermatology          | USA            | VC                | 70         |
| 52,000                | 112          | 52                  | 8.93                  | Mixed - Prisons      | USA            | VC                | 71         |
| 535                   | 1            | 52                  | 10.29                 | Critical Care        | USA            | VC                | 72         |
| 1,164                 | 2            | 52                  | 11.19                 | Primary Care         | USA            | VC                | 73         |
| 80,000                | 12           | 260                 | 25.64                 | Emergency            | USA            | VC                | 74         |

| Total Consuls | Sites | Duration Wks | Cons/Site/Week | Specialty            | Country       | Technology | Ref |
|---------------|-------|--------------|----------------|----------------------|---------------|------------|-----|
| 15,678        | 172   | 52           | 1.75           | Diabetic Retinopathy | USA           | Web        | 75  |
| 318           | 1     | 104          | 3.06           | Diabetic Retinopathy | International | SF         | 76  |
| 22,234        | 23    | 156          | 6.20           | Diabetic Retinopathy | France        | Web        | 77  |
| 120,000       | 200   | 52           | 11.54          | Diabetic Retinopathy | USA           | SF         | 78  |
| 1,800         | 1     | 156          | 11.54          | Diabetic Retinopathy | USA           | Web        | 79  |
| 12,701        | 6     | 60           | 35.28          | Diabetic Retinopathy | USA           | Web        | 80  |
| 2,962         | 1     | 52           | 56.96          | Diabetic Retinopathy | Finland       | CD         | 81  |
| 20,080        | 1     | 108          | 185.93         | Diabetic Retinopathy | India         | SF         | 82  |

#### Reference List

- 1 Sun A, Lanier R, Diven D. Teledermatology at the South Pole; 2009, p S-125.
- 2 Reyna M, Sable C, Conroy MB, Kushner DC. A comprehensive telemedicine solution for delivery of pediatric care in suburban hospitals: factors influencing utilization of sub-specialty services; 2005, p 208.
- 3 Ohinmaa A, Roine R, Hailey D, Kuusimaki ML, Winblad I. The use of videoconferencing for mental health services in Finland. *J Telemed Telecare* **2008**;14:266-270.
- 4 Wang Z, Gu H. A review of telemedicine in China. *J Telemed Telecare* **2009**;15:23-27.
- 5 Roth A, Rogowski O, Yanay Y, Kehati M, Malov N, Golovner M. Teleconsultation for cardiac patients: a comparison between nurses and physicians: the SHL experience in Israel. *Telemed J E Health* **2006**;12:528-534.
- 6 Scalvini S, Mazzu M, Giordano A, Zanelli E, Piemontese C, Fedele F, Glisenti F. A review of seven years' telecardiology experience. *J Telemed Telecare* **2007**;13:50-52.
- 7 Blanchet KD. Innovative programs in telemedicine HealthBridge. *Telemed J E Health* **2009**;15:502-506.
- 8 Smith AC, Kimble R, O'Brien A, Mill J, Wootton R. A telepaediatric burns service and the potential travel savings for families living in regional Australia. *J Telemed Telecare* **2007**;13:76-79.
- 9 Wootton R. Telemedicine support for the developing world. *J Telemed Telecare* **2008**;14:109-114.
- 10 Heath B, Salerno R, Hopkins A, Caputo M. Rural pediatric critical care telemedicine: summary of the Vermont experience; 2008, p 59.
- 11 Samii A, Ryan-Dykes P, Tsukuda RA, Zink C, Franks R, Nichol WP. Telemedicine for delivery of health care in Parkinson's disease. *J Telemed Telecare* **2006**;12:16-18.
- 12 Lavrentyev V, Seay A, Rafiq A, Justis D, Merrell RC. A surgical telemedicine clinic in a correctional setting. *Telemed J E Health* **2008**;14:385-388.

- 13 Dillon E, Loermans J, Davis D, Xu C. Evaluation of the Western Australian Department of Health telehealth project. *J Telemed Telecare* **2005**;11 Suppl 2:S19-S21.
- 14 McCrossan BA, Grant B, Morgan GJ, Sands AJ, Craig B, Casey FA. Diagnosis of congenital heart disease in neonates by videoconferencing: an eight-year experience. *J Telemed Telecare* **2008**;14:137-140.
- 15 Ohinma A, Scott R. A costing model for videoconferencing in Alberta. *J Telemed Telecare* **2006**;12:363-369.
- 16 Knol A, van den Akker TW, Damstra RJ, de Haan J. Teledermatology reduces the number of patient referrals to a dermatologist. *J Telemed Telecare* **2006**;12:75-78.
- 17 Mahnke C, Bervall E, Pinsker J, Person DA, Eble M. Pacific asynchronous telehealth: providing pediatric specialty consultation abroad; 2009, p S97.
- 18 Jialdasani R, Desai S, Gupta M, Kothari A, Deshpande R, Shet T, Ramadwar M, Kane S, Chinoy R. An analysis of 46 static telectyology cases over a period of two years. *J Telemed Telecare* **2006**;12:311-314.
- 19 Blanchet KD. Innovative programs in telemedicine: the University of Pittsburgh Medical Center (UPMC) Stroke Institute Telemedicine Program. *Telemed J E Health* **2008**;14:517-519.
- 20 Waite K, Silver F, Jaigobin C, Black S, Lee L, Murray B, Danyliuk P, Brown EM. Telestroke: a multi-site, emergency-based telemedicine service in Ontario. *J Telemed Telecare* **2006**;12:141-145.
- 21 Avram S, Ferrier S, Thomas S. Northern Sierra rural health network: connecting people to care; 2006, p 234.
- 22 Mishra A, Kapoor L, Mishra SK. Post-operative care through tele-follow up visits in patients undergoing thyroidectomy and parathyroidectomy in a resource-constrained environment. *J Telemed Telecare* **2009**;15:73-76.
- 23 Marcin JP, Nesbitt TS, Cole SL, Knuttel RM, Hilty DM, Prescott PT, Daschbach MM. Changes in diagnosis, treatment, and clinical improvement among patients receiving telemedicine consultations. *Telemed J E Health* **2005**;11:36-43.
- 24 Kosutic J, Rigby ML, Mijin D, Weatherburn G, Jowett V, Vukomanovic V, Rakic S, Markovic G. Low-bandwidth teleconsultations for patients with complex congenital heart diseases. *J Telemed Telecare* **2007**;13:113-118.
- 25 Jordan KL, Ramey E, Barnes MM, Ferrigno KJ, Mohr BA. University of Florida University of Florida, department of pediatrics, child protection team: lights action camera, telemedicine!; 2005, p 249.
- 26 Ellenby MS, Hoffman KG, Roe T, Burrell J. Oregon Health and Science University - Sacred Heart Medical Center pediatric critical care consult telemedicine program; 2009, p 722.
- 27 Kokesh J, Ferguson AS, Patricoski C, LeMaster B. Traveling an audiologist to provide otolaryngology care using store-and-forward telemedicine. *Telemed J E Health* **2009**;15:758-763.

- 28 Al Kadi A, Dyer D, Ball CG, McBeth PB, Hall R, Lan S, Gauthier C, Boyd J, Cusden J, Turner C, Hamilton DR, Kirkpatrick AW. User's perceptions of remote trauma telephonography. *J Telemed Telecare* **2009**;15:251-254.
- 29 Hailey D, Ohinma A, Roine R, Bulger T. Uptake of telemental health services in Alberta: a success, but not in all regions. *J Telemed Telecare* **2007**;13:42-44.
- 30 Hall-Barrow JC, MNP. Rural telemedicine: angels outreach and education; 2006, p 257.
- 31 Tofukuji I, Kanno K, Yamaguchi M, Ohyama N. Development of telepathology network based on on-demand vpn; 2005, p 263.
- 32 Nelson EL. Evolution of a school based program; 2008, p 50.
- 33 Kennedy C, Bowman R, Fariza N, Ackuaku E, Ntim-Amponsah C, Murdoch I. Audit of Web-based telemedicine in ophthalmology. *J Telemed Telecare* **2006**;12:88-91.
- 34 Smith AC, Stathis S, Randell A, Best D, Ryan VN, Bergwever E, Keegan F, Fraser E, Scuffham P, Wooton R. A cost-minimization analysis of a telepaediatric mental health service for patients in rural and remote Queensland. *J Telemed Telecare* **2007**;13:79-83.
- 35 Lopez AM, Barker G, Bhattacharyya AK, Scott K, Krupinski E, Richter L, Davenport J, Lazarus S, Kreykes L. Women's health through telemedicine: a panel discussion; 2009, p 69.
- 36 Mucic D. International telepsychiatry: a study of patient acceptability. *J Telemed Telecare* **2008**;14:241-243.
- 37 Qaddoumi I, Bouffet E. Supplementation of a successful pediatric neuro-oncology telemedicine-based twinning program by e-mails. *Telemed J E Health* **2009**;15:975-982.
- 38 Benton T, Manley M, Lowery CL, Ott R. Distant providers, close support: rural recruitment & retention through telemedicine; 2009, p S57.
- 39 Krupinski E, Barker GP, Lopez AM, Weinstein RS. 10- year analysis of telepsychiatry cases at an academic medical center; 2008, p 55.
- 40 Blanchet KD. Innovative programs in telemedicine: Great Plains Telehealth Resource and Assistance Center. *Telemed J E Health* **2008**;14:870-874.
- 41 Ellis DG, Mayrose J, Phelan M. Consultation times in emergency telemedicine using realtime videoconferencing. *J Telemed Telecare* **2006**;12:303-305.
- 42 Riesenbach R. Technical innovation in the creation of Canada's largest telemedicine network; 2007, p 169.
- 43 Pak H. Telethinking. *Telemed J E Health* **2007**;13:483-486.
- 44 Yellowlees P, Bourgeois JA, Hilty DM, Neufeld JD, Cobb HC. The e-mental health project at UC Davis- a consultation liaison primary care program with excellent clinical outcomes; 2006, p 211.
- 45 Miller DR, Alam K, Fraser S, Ferguson J. The delivery of a minor injuries telemedicine service by Emergency Nurse Practitioners. *J Telemed Telecare* **2008**;14:143-144.
- 46 Sable C, Reyna M, Hopkins P, Dixon RF, Sabouni S, Holbrook P. Evolution of pediatric telecardiology practice: point to point wide area network; 2008, pp 75-76.

- 47 Webster K, Fraser S, Mair F, Ferguson J. Provision of telehealth to the Scottish Police College. *J Telemed Telecare* **2008**;14:160-162.
- 48 Cuyler RN. Telepsychiatry in rural outpatient geriatric care; 2008, p 78.
- 49 Pedragosa A, Alvarez-Sabin J, Molina CA, Sanclemente C, Martin MC, Alonso F, Ribo M. Impact of a telemedicine system on acute stroke care in a community hospital. *J Telemed Telecare* **2009**;15:260-263.
- 50 Antoniotti NM. Telethinking with Nina M. Antoniotti, R.N., M.B.A., Ph.D. Interview by Vicki Glaser. *Telemed J E Health* **2005**;11:517-521.
- 51 Heinzelmann PJ, Jacques G, Kvedar JC. Telemedicine by email in remote Cambodia. *J Telemed Telecare* **2005**;11 Suppl 2:S44-S47.
- 52 Myers KM, Valentine JM, Melzer SM. Child and adolescent telepsychiatry: utilization and satisfaction. *Telemed J E Health* **2008**;14:131-137.
- 53 Hutarew G, Schlicker HU, Idriceanu C, Strasser F, Dietze O. Four years experience with teleneuropathology. *J Telemed Telecare* **2006**;12:387-391.
- 54 Cole SL, Nesbitt TS. The financial impact of telemedicine; 2005, p 220.
- 55 Moreno-Ramirez D, Ferrandiz L, Ruiz-de-Casas A, Nieto-Garcia A, Moreno-Alvarez P, Galdeano R, Camacho FM. Economic evaluation of a store-and-forward teledermatology system for skin cancer patients. *J Telemed Telecare* **2009**;15:40-45.
- 56 Kumar S, Tay-Kearney ML, Chaves F, Constable IJ, Yogesan K. Remote ophthalmology services: cost comparison of telemedicine and alternative service delivery options. *J Telemed Telecare* **2006**;12:19-22.
- 57 Melzer SM, Valentine JM, Myers KM. Experience with pediatric telemedicine services in a regional network; 2008, p 74.
- 58 Huang T, Moon-Grady AJ, Traugott C, Marcin J. The availability of telecardiology consultations and transfer patterns from a remote neonatal intensive care unit. *J Telemed Telecare* **2008**;14:244-248.
- 59 Whitten P, Buis L. Use of telemedicine for haemodialysis: perceptions of patients and health-care providers, and clinical effects. *J Telemed Telecare* **2008**;14:75-78.
- 60 Di Lieto A, De Falco M, Campanile M, Torok M, Gabor S, Scaramellino M, Schiraldi P, Ciociola F. Regional and international prenatal telemedicine network for computerized antepartum cardiotocography. *Telemed J E Health* **2008**;14:49-54.
- 61 Burdick A, Berman B, Keri J, Alonso J, Wonderlich K, Lappan C, Avashia N. Teledermatology cases, University of Miami and Great Plains Regional Medical; 2009, p S-64.
- 62 Agan N, Franklin S, Hickey W, Perkins R, Jaramillo V, Wendel P, Lowery C, Orr R. Reflecting on rural practice: telemedicine satellite clinic lessons learned; 2009, p S-57.
- 63 Chardos J, Agha Z, Fiedler J. No-show rate for TMH compared to face-to-face mental health; 2008, p 59.

- 64 Boeddicker A. European telehealth networks for oncology case discussions and stroke units. *J Telemed Telecare* **2006**;12:17-20.
- 65 Alkmim MB, Figueira RM, Ribeiro AL, Campos FE. Quality and cost improvements through telecardiology in Minas Gerais, Brazil; 2009, p S-29.
- 66 Bingham E, Patterson V. A telemedicine-enabled nurse-led epilepsy service is acceptable and sustainable. *J Telemed Telecare* **2007**;13:19-21.
- 67 Fox KC, Connor P, McCullers E, Waters T. Effect of a behavioural health and specialty care telemedicine programme on goal attainment for youths in juvenile detention. *J Telemed Telecare* **2008**;14:227-230.
- 68 Blanchet KD. Innovative programs in telemedicine. University of Texas Medical Branch at Galveston electronic health network. *Telemed J E Health* **2005**;11:116-123.
- 69 Fernandez FJ, Escobar E, Adiazola P, Aravena J. Technology considerations to reach 100% countrywide tele-electrocardiography coverage: the Chilean experience. *Telemed J E Health* **2007**;13:201.
- 70 Armstrong AW, Dorer DJ, Lugin NE, Kvedar JC. Economic evaluation of interactive teledermatology compared with conventional care. *Telemed J E Health* **2007**;13:91-99.
- 71 Hammack GG, Boltinghouse OW. Current status and operations of the UTMB digital medical services system; 2005, p 189.
- 72 Reynolds HN. Underserved does not necessarily mean rural. *Telemed J E Health* **2008**;14:103.
- 73 Hartshorn JC, Raimer BG. Primary care telemedicine: increased patient satisfaction and lower costs; 2005, p 247.
- 74 Galli R, Henderson K, Hall G. Teleemergency - providing emergency care in a rural setting; 2009, p S64-S65.
- 75 Kim C, Zimmer-Galler I, Quinn K, Zeimer R. Utilization of a diabetic retinopathy assessment program in primary care; 2008, p 68.
- 76 Silva PS, Hock KM, Grossman MM, Cavallerano J, Sun JK, Aiello LM. Joslin Vision NNetwork - pediatric diabetes telemedicine eye care; 2009, p 719.
- 77 Erginay A, Chabois A, Gaudric A, Massin P. A screening program for diabetic retinopathy in the Paris area by using a telmedical network (OPHDIAT). *Telemed J E Health* **2008**;14:108.
- 78 Dayhoff R, Kuzmak P, Werfel J, Stuart F, El Hattah O. VA's nationwide telemedicine imaging capabilities for clinical specialties; 2009, p S-76-S-77.
- 79 Coll K, Birkmire-Peters DP, Pelletier BA, Buesell S. Joslin vision network: eye care visits following JVN imaging. *Telemed J E Health* **2005**;11:244.
- 80 Jackson-Moore D, Crammer R, Saxon G, Harper R. Trip (Teloretinal Imaging Program) in VHA VISN 16. *Telemed J E Health* **2008**;14:69.
- 81 Lemmetty R, Makela K. Mobile digital fundus screening of type 2 diabetes patients in the Finnish county of South-Ostrobothnia. *J Telemed Telecare* **2009**;15:68-72.

82 Bai VT, Murali V, Kim R, Srivatsa SK. Teleophthalmology-based rural eye care in India. *Telemed J E Health* **2007**;13:313-321.
